# Supplementary material
Source: PubMed Central journal article supplement (PMC2815995)
Supplement: JCO.2009.23.4781_1.pdf [file JCO.2009.23.4781_1.pdf]

# DNA Methylation Predicts Survival and Response to Therapy in Patients with Myelodysplastic Syndromes

Jean-Pierre J. Issa, et al.

## Appendix Methods-Statistical Analysis

To evaluate the effect of the overall genes, methylation for each gene among the patients was standardized by the Z score method, and the Z score was calculated by  $(X-\mu)/\sigma$ : X stands for methylation data of each gene in each sample;  $\mu$  stands for mean of methylation of each gene among all samples; and  $\sigma$  stands for standard deviation. Each patient was then assigned a methylation “score” based on the average of Z scores for all genes. The mean and standard deviation of methylation for each gene were calculated from 89 patients in the training cohort. We also used these patients as a reference population to calculate the median methylation Z-score for all genes. Patients were classified into two groups: methylation high, if the methylation scores were greater than the median of the reference population; or methylation low, if the methylation scores were lower than the median of the reference population.

Correlations between methylation and clinical parameters were analyzed with Chi-square tests for categorical variables and with Fisher’s exact test when testing small samples. The Wilcoxon rank-sum test or Kruskal Wallis non-parametric test were used to compare two groups of independent but continuous variables. Overall survival was calculated from the date of baseline sampling to that of last follow-up or death, and progression-free survival was calculated from the date of baseline sampling to that of AML diagnosis, death, or last follow-up.

Data Supplement Figure 1. Representative bisulfite-pyrosequencing results of ten genes from two MDS patients. Gene name is indicated on the left. The percentage methylation is quantified by pyrosequencer and indicated at the top of each CpG sites analyzed.

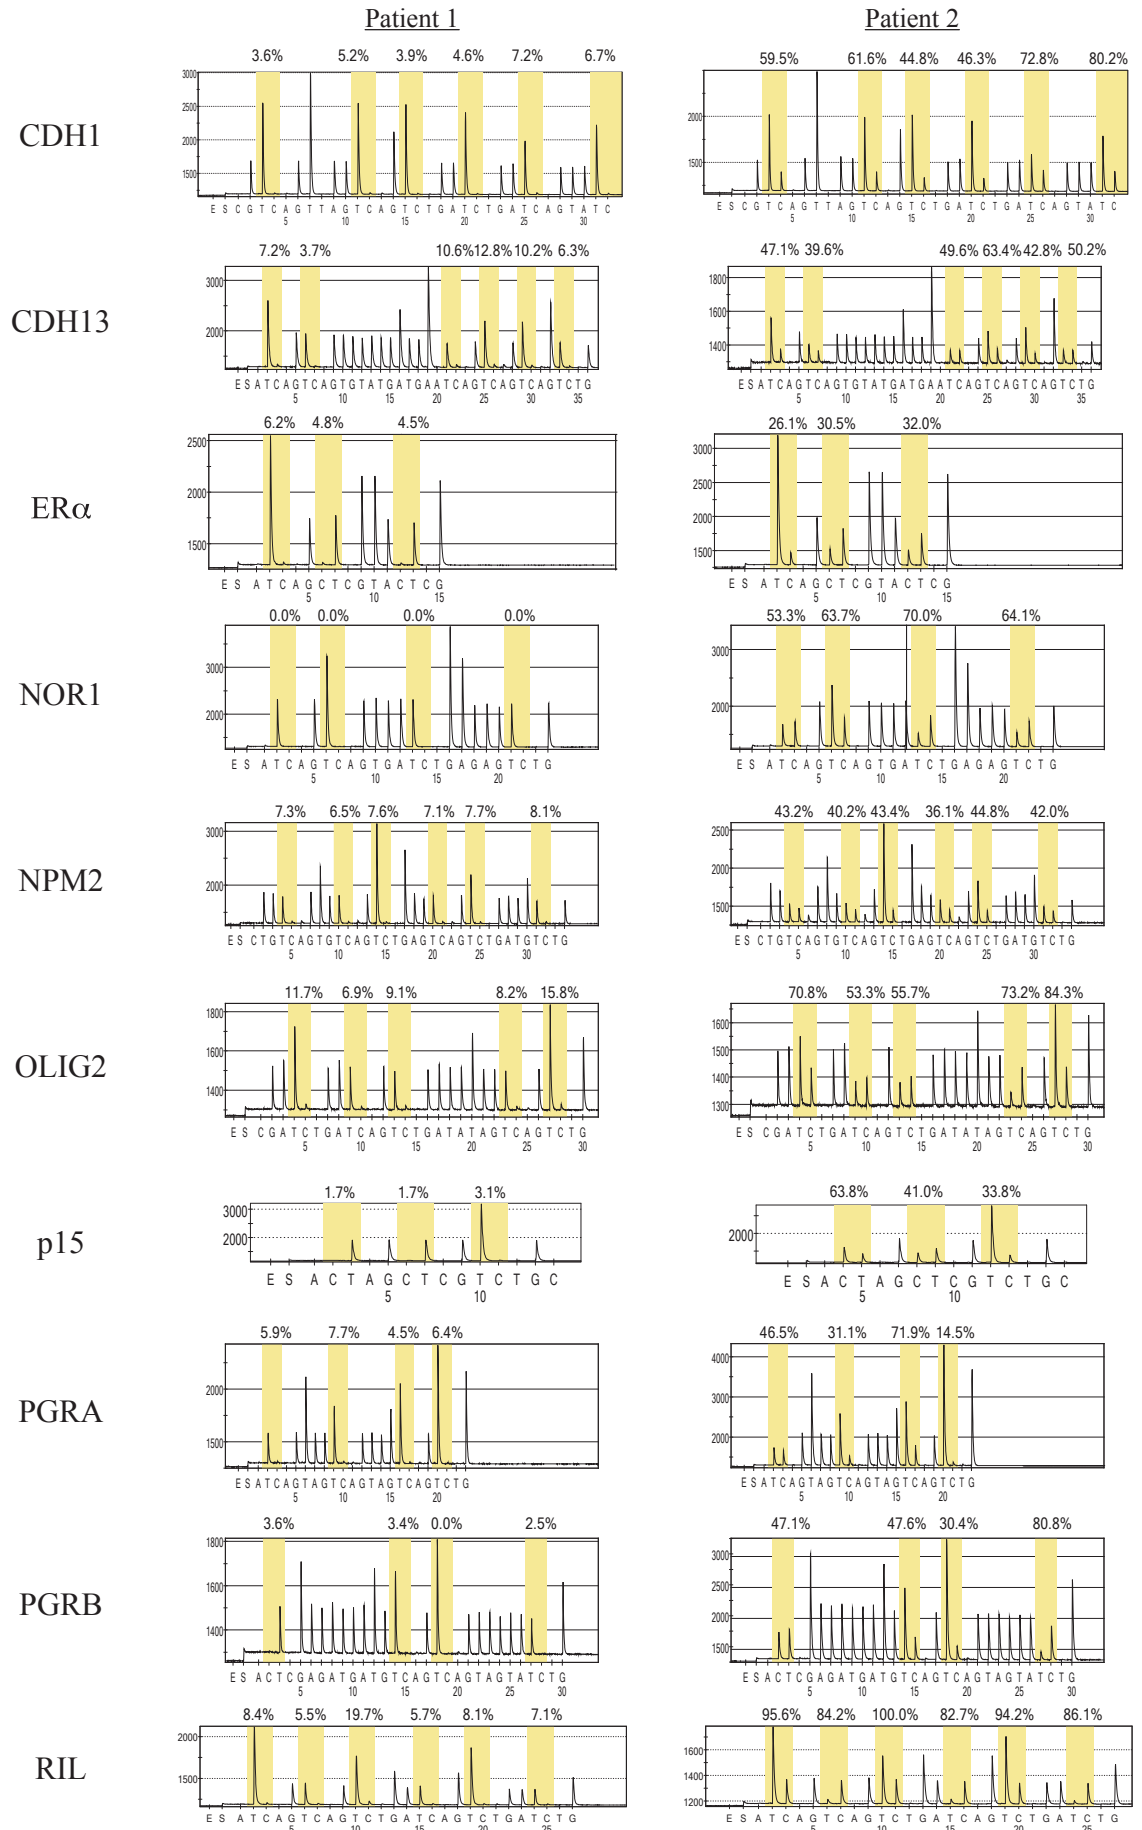

Data Supplement Figure 2.

A. Comparison of methylation analysis between the two independent bisulfite-pyrosequencing results using same sample processed at different times. We found the correlation between the two duplicates was 0.92 (N=93), indicating that the method is highly reproducible.

B. Comparison of methylation between bone marrow and blood. We compared DNA methylation in bone marrow versus blood from 25 patients obtained at same time, a significant correlation in DNA methylation was found between these two types of samples (N=117, R=0.93).

C. Comparison of methylation between CD34+ and negative cells. A perfect correlation was observed in methylation between sorted CD34+ and CD3/19- cells from the same patients (N=13, R=0.91).

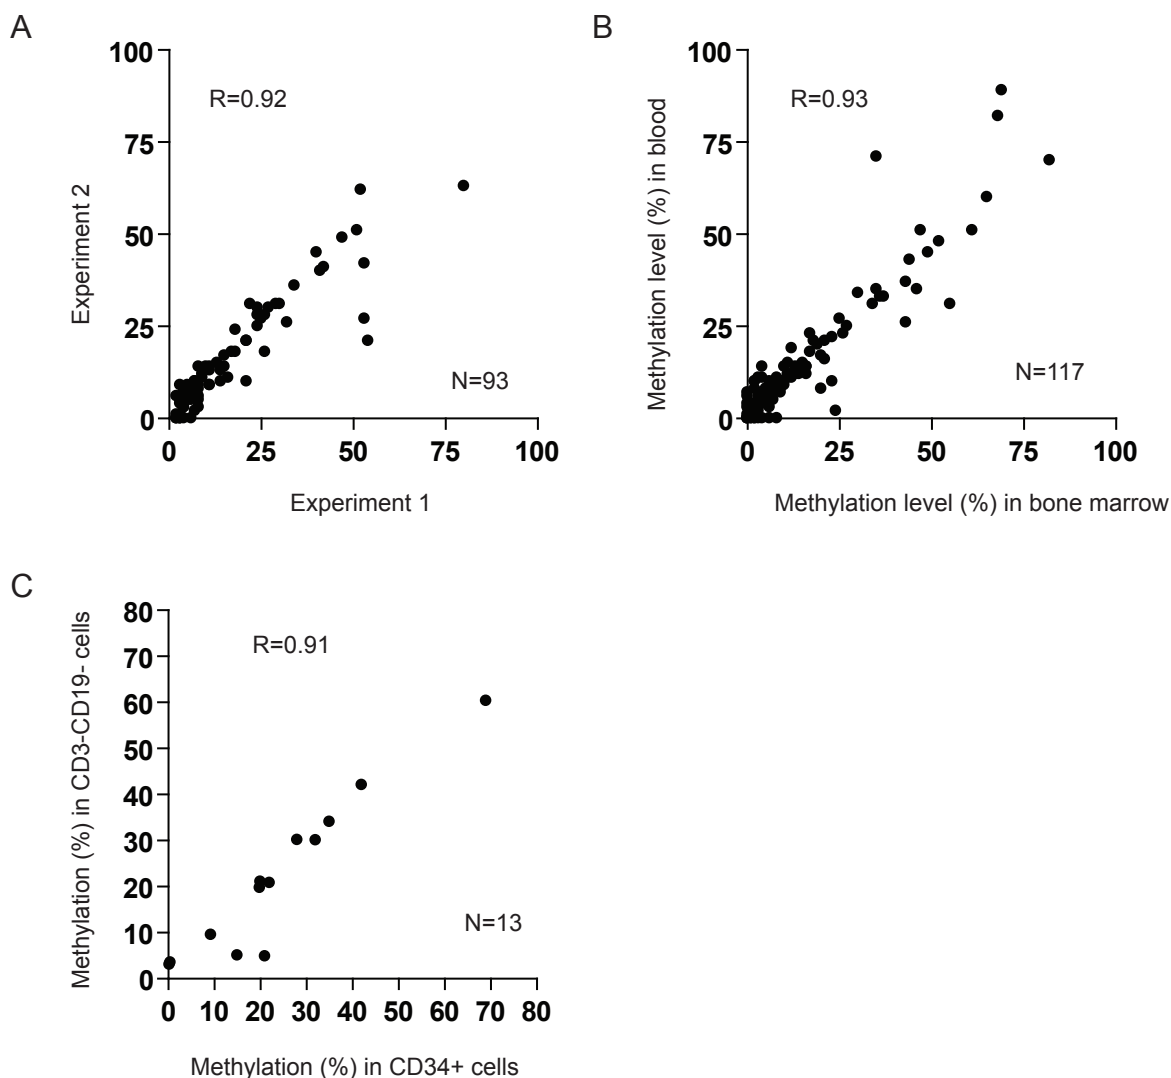

Data Supplement Figure 3. DNA methylation profiling in MDS patients.

The methylation status of ten methylation markers was determined in pretreatment samples from the training cohort (A), first validation cohort (B) and second validation cohort (C). Each column represents a unique patient sample. Each row represents one of the ten genes analyzed (gene names are listed at the left of the figure). Methylation level is shown in two scales: red: methylation level greater than 15%; green: methylation level less than 15%. White indicates no data.

A. Training cohort

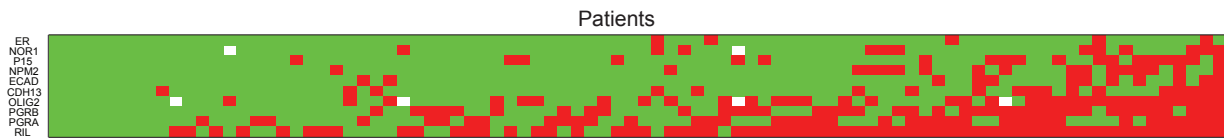

B. Validation cohort1

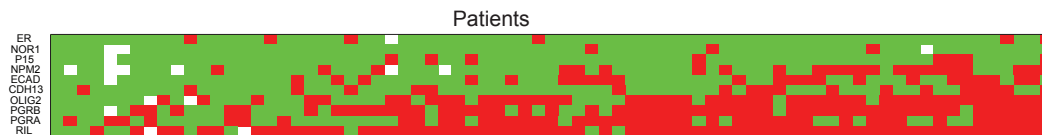

C. Validation cohort2

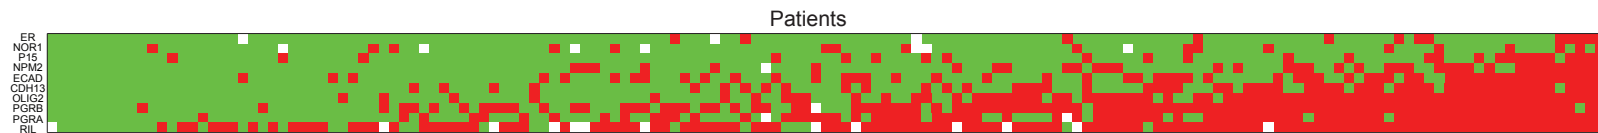

Data Supplement Figure 4.

Kaplan-Meier survival analysis based on baseline methylation score and treatment in the training cohort. Overall survival and progression-free survival are shown for the 45 methylation low patients (Panel A and C, respectively) and the 44 methylation high patients (Panel B and D, respectively). In each panel, patients are grouped based on treatment with decitabine (orange) or supportive care alone (grey). P values are based on the log-rank test.

A. Methylation low group

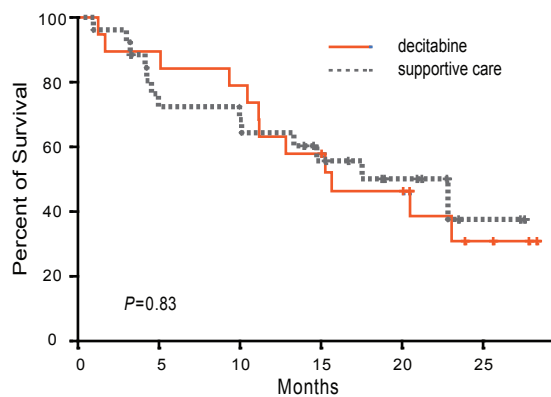

C. Methylation low group

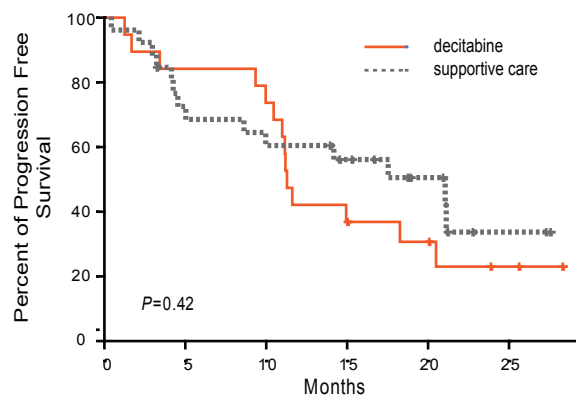

B. Methylation high group

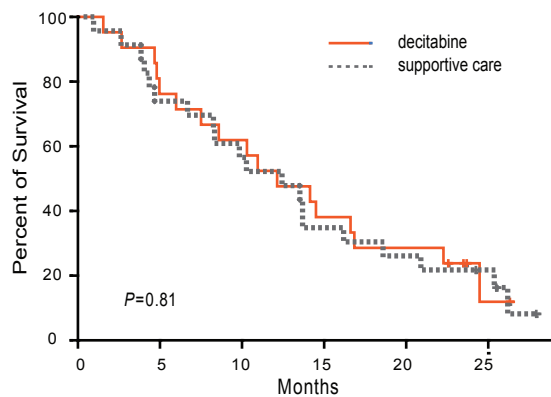

D. Methylation high group

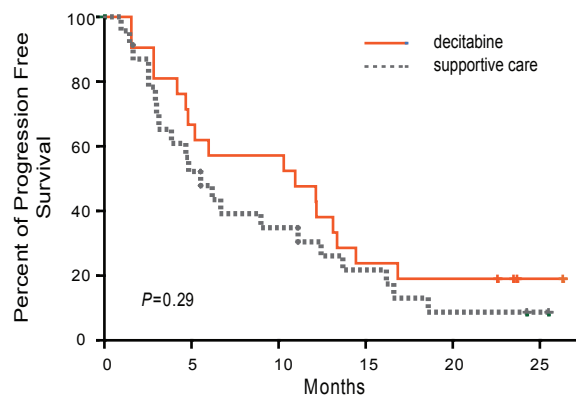

Data Supplement Figure 5.

Kaplan-Meier survival estimates in MDS patients from the second validation cohort. Overall survival and progression-free survival are shown for the 34 low risk MDS patients (Panel A and Panel B, respectively) and the 116 high risk MDS patients (Panel C and Panel D, respectively). In each panel, patients are grouped into methylation low (blue) and methylation high (red) according to their combined methylation Z-scores. Median survivals (95% CI) of each group in each panel are shown in the figure.

A. Low-risk MDS

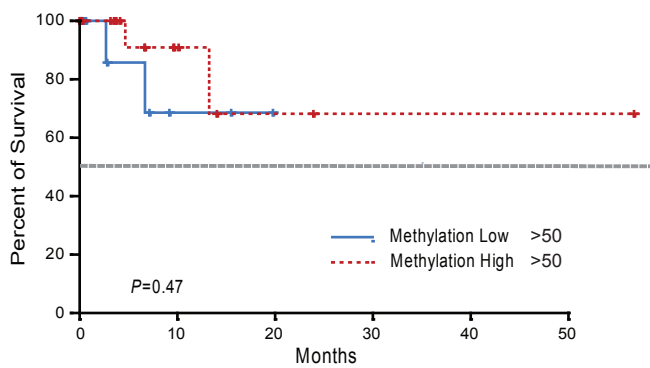

| No. AT Risk      | 0  | 5 | 10 | 15 | 20 | 25 |
|------------------|----|---|----|----|----|----|
| Methylation low  | 13 | 2 | 0  | 0  | 0  | 0  |
| Methylation high | 21 | 5 | 2  | 1  | 1  | 1  |

B. Low-risk MDS

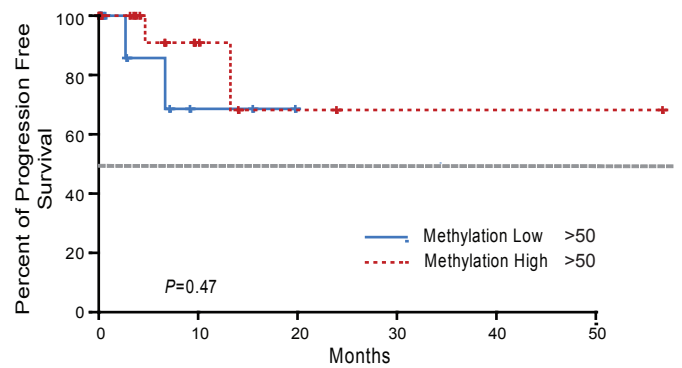

| No. AT Risk      | 0  | 5 | 10 | 15 | 20 | 25 |
|------------------|----|---|----|----|----|----|
| Methylation low  | 13 | 2 | 0  | 0  | 0  | 0  |
| Methylation high | 21 | 5 | 2  | 1  | 1  | 1  |

C. Other MDS patients

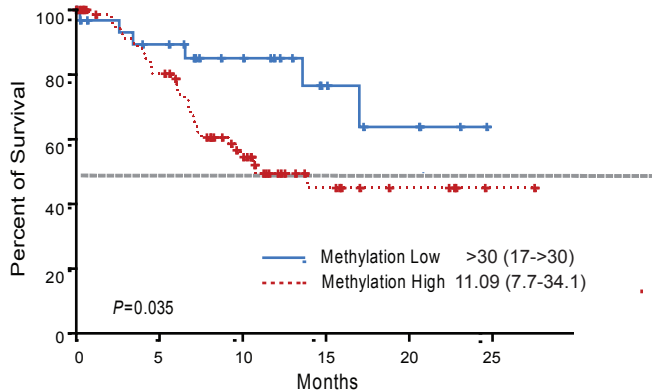

| No. AT Risk      | 0  | 5  | 10 | 15 | 20 | 25 |
|------------------|----|----|----|----|----|----|
| Methylation low  | 33 | 23 | 15 | 9  | 4  | 1  |
| Methylation high | 83 | 52 | 27 | 11 | 5  | 2  |

D. Other MDS patients

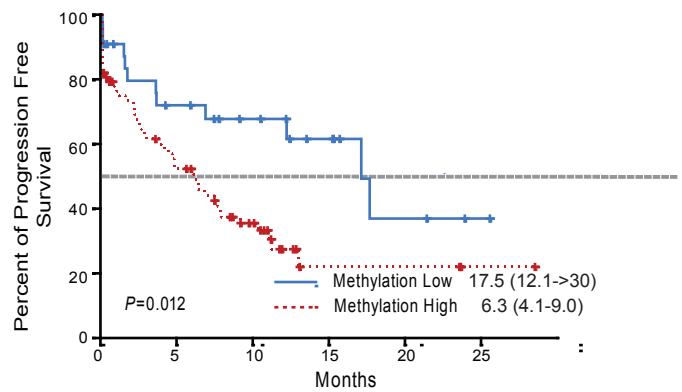

| No. AT Risk      | 0  | 5  | 10 | 15 | 20 | 25 |
|------------------|----|----|----|----|----|----|
| Methylation Low  | 32 | 18 | 13 | 8  | 3  | 1  |
| Methylation High | 79 | 34 | 16 | 3  | 3  | 1  |

Data Supplement Figure 6. Kaplan-Meier survival estimates in MDS patients who did not receive treatment with hypomethylating agents. Left panel shows overall survival and right panel shows progression-free survival.

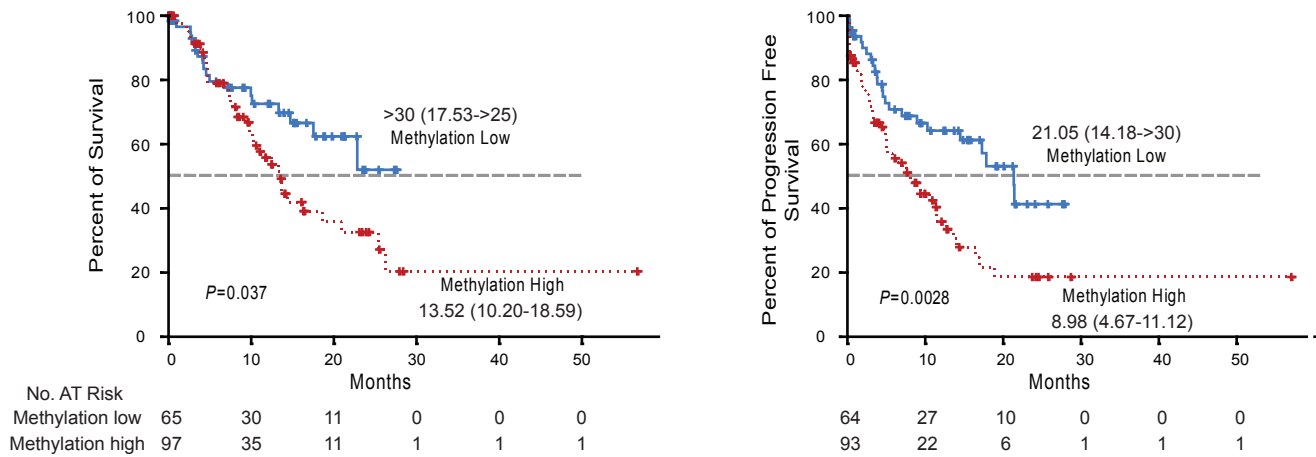

Data Supplement Table 1. Primer Design and Conditions for Quantitative Bisulfite-Pyrosequencing Analyses

| Region        | Primer sequences and annealing temperature                                                                                                                            | Product length (bp) | Sequencing primers                                        | Sequence length (bp) |
|---------------|-----------------------------------------------------------------------------------------------------------------------------------------------------------------------|---------------------|-----------------------------------------------------------|----------------------|
| P15           | Forward<br>GTTTTTTTTTAGAAGTAATTTAGG<br>Reverse (5'-Biotin)<br>TCCTTCTACRACCTAAAACC<br>50°C                                                                            | 113                 | TTTTTAGAAGTAATTTAGG                                       | 8                    |
| CDH1          | Forward<br>GGAATTGTAAAGTATTTGTGAGTTT<br>Reverse-Universal<br>GGGACACCGCTGATCGTTTATCCAAAAACCCATAACTAACC<br>Universal (5'-Biotin)<br>GGGACACCGCTGATCGTTTA<br>55°C       | 128                 | GGAAGTTAGTTTAGATTTTA                                      | 34                   |
| Era           | Forward<br>TGTGTTTTTTTTTAGGTGG<br>Reverse (5'-Biotin)<br>AACCATCCCAAATACTTTAATA<br>58/56/54/52°C                                                                      | 125                 | GGATACGGTTTGTATTTTG                                       | 13                   |
| RIL<br>PDLIM4 | Forward<br>TTTGTGAGTTTGGATTGGT<br>Reverse (5'-Biotin)<br>CCCCAAATAAACCTCCAT<br>58/56/54/52°C<br>(antisense)                                                           | 270                 | Seq1:<br>TTTATTTAGTTTTTAGAGAT<br>Seq2:<br>TGTGAGTTTGGATTG | 25<br>14             |
| PGRA          | Forward<br>TGATTGAGTTGAAGGTAAAG<br>Reverse-Universal<br>GGGACACCGCTGATCGTTTAAAATCCTATCCCTAACAAAA<br>Universal (5'-Biotin)<br>GGGACACCGCTGATCGTTTA<br>50°C             | 225                 | Seq1:<br>GGATTTTTATTGTTGTGT<br>Seq2:<br>GGGGAGTTAGATTT    | 27<br>24             |
| PGRB          | Forward<br>TGTGGGTGGTATTTTAAATGAGA<br>Reverse-Universal<br>GGGACACCGCTGATCGTTTACCCCTCACTAAAACCCTAAA<br>Universal (5'-Biotin)<br>GGGACACCGCTGATCGTTTA<br>58/56/54/52°C | 227                 | GGGATTTGAGATTTT                                           | 27                   |
| CDH13         | Forward                                                                                                                                                               |                     |                                                           |                      |



|       |                                               |     |                      |    |
|-------|-----------------------------------------------|-----|----------------------|----|
|       | TTTGGGAAGTTGGTTGGTTG                          | 186 | Seq1:                |    |
|       | Reverse (5'-Biotin)                           |     | GGAAAATATGTTTAGTGTAG | 31 |
|       | ACAACCCCTCTCCCTACct                           |     | Seq2:                |    |
|       | 55°C                                          |     | TTTTTTTTAAAGTTTGGTTT | 11 |
| NOR1  | Forward                                       |     |                      |    |
|       | GAGTTGGATTGGTGAAGAGTT                         | 151 | TTAGGTTGTTGGGGTAA    | 19 |
|       | Reverse-Universal                             |     |                      |    |
|       | GGGACACCGCTGATCGTTTAAACCAAACCCCTTCTAATT       |     |                      |    |
|       | Universal (5'-Biotin)                         |     |                      |    |
|       | GGGACACCGCTGATCGTTTA                          |     |                      |    |
|       | 50°C                                          |     |                      |    |
| NPM2  | Forward                                       |     |                      |    |
|       | TTTTTAGGTTAGAGGGGATGAG                        | 195 | Seq1:                |    |
|       | Reverse-Universal                             |     | GTTAGAGGGGATGAGGT    | 32 |
|       | GGGACACCGCTGATCGTTTATAAACCTAACTCAAAAACCTCTATA |     | Seq2:                |    |
|       | Universal (5'-Biotin)                         |     | GGGAGTTGGGATTTAAG    | 9  |
|       | GGGACACCGCTGATCGTTTA                          |     |                      |    |
|       | 58/56/54/52°C                                 |     |                      |    |
| OLIG2 | Forward                                       |     |                      |    |
|       | TTTTAAAGGTGAGGATGTTTATTAT                     | 229 | AGGTGAGGATGTTTATTATA | 24 |
|       | Reverse-Universal                             |     |                      |    |
|       | GGGACACCGCTGATCGTTTAAAAAATCCAAACCCCTATAT      |     |                      |    |
|       | Universal (5'-Biotin)                         |     |                      |    |
|       | GGGACACCGCTGATCGTTTA                          |     |                      |    |
|       | 50°C                                          |     |                      |    |

---

Data Supplement Table 2. Initial Screening of Methylation Markers in 24 MDS Patients

| Source                                                      | Genes                | Accession No. | Chr.<br>Band | Function                                                                    | Methylation      |                    |
|-------------------------------------------------------------|----------------------|---------------|--------------|-----------------------------------------------------------------------------|------------------|--------------------|
|                                                             |                      |               |              |                                                                             | % positive cases | Average level (SD) |
| <b>Genes identified by genome-wide MCA/RDA method</b>       |                      |               |              |                                                                             |                  |                    |
|                                                             | PGRB                 | NM_000926     | 11q22        | a member of the steroid receptor superfamily                                | 63               | 18 (11.6)          |
|                                                             | RIL                  | NM_003687     | 5q31.1       | PDZ and LIM domain 4                                                        | 58               | 41 (33)            |
|                                                             | CDH13                | NM_001257     | 16q24.2      | a calcium dependent cell-cell adhesion glycoprotein                         | 38               | 16 (12.7)          |
|                                                             | OLIG2                | NM_005806     | 11q11        | oligodendrocyte lineage transcription factor 2                              | 33               | 12 (10.9)          |
|                                                             | PGRA                 | NM_000926     | 11q22        | a member of the steroid receptor superfamily                                | 26               | 12 (9.4)           |
|                                                             | NOR1                 | NM_145047     | 1p34.3       | oxidored-nitro domain-containing protein, C1orf102                          | 25               | 15 (23.3)          |
|                                                             | NPM2                 | NM_181345     | 8p21.3       | nucleolar organization and embryonic development                            | 25               | 12 (13.1)          |
|                                                             | SCGB3A1              | NM_052863     | 5q35         | secretoglobin, negative regulation of cell growth and proliferation         | 10               | 9 (5.1)            |
|                                                             | TCEA3                | NM_003196     | 1q36.12      | transcription elongation factor A                                           | 7                | 3 (5.0)            |
|                                                             | EDG4                 | NM_004720     | 19p12        | lysophosphatidic acid receptor 2, G protein-coupled receptor                | 5                | 7 (11.7)           |
|                                                             | TERT                 | NM_198253     | 5p15.33      | telomerase reverse transcriptase                                            | 5                | 4 (9.0)            |
|                                                             | ECGF1                | NM_001113755  | 22q13.33     | thymidine phosphorylase, encodes an angiogenic factor                       | 0                | 4 (1.0)            |
|                                                             | FADS2                | NM_004265     | 11q12        | a member of the fatty acid desaturase gene family                           | 0                | 1 (0.4)            |
|                                                             | FLJ36116             | AK093435      | 1p13.2       | hypothetical protein LOC388666                                              | 0                | 3 (2.1)            |
|                                                             | NKD2                 | NM_033120     | 5p15.3       | naked cuticle homolog 2, negative regulator of the Wnt-catenin-Tcf pathway  | 0                | 4 (2.1)            |
|                                                             | SLC26A4              | NM_000441     | 7q31         | solute carrier family 26, homology to sulfate transporters                  | 0                | 3 (2.2)            |
|                                                             | TYSND1               | NM_001040273  | 10q22.1      | trypsin domain containing 1, involved in beta-oxidation of fatty acids      | 0                | 1 (0)              |
| <b>Reports identifying aberrant methylated genes in MDS</b> |                      |               |              |                                                                             |                  |                    |
|                                                             | p15 <sup>INK4b</sup> | NM_004936     | 9p21         | cyclin-dependent kinase inhibitor 2B                                        | 54               | 20 (15.9)          |
|                                                             | CDH1                 | NM_004360     | 16q22.1      | E-cadherin, a calcium dependent cell-cell adhesion glycoprotein             | 38               | 14 (16.2)          |
|                                                             | ERa                  | NM_000125     | 6q25.1       | a ligand-activated transcription factor                                     | 12               | 6 (7.44)           |
|                                                             | p16 <sup>INK4a</sup> | NM_000077     | 9p21         | cyclin-dependent kinase inhibitor 2A                                        | 0                | 2 (3.9)            |
|                                                             | p73                  | NM_001126240  | 1p36.3       | tumor protein p73, a member of the p53 family of transcription factors      | 0                | 2 (1.0)            |
|                                                             | DAPK                 | NM_004938     | 9q34.1       | death-associated protein kinase 1 involved in interferon induced cell death | 0                | 1 (0.6)            |
|                                                             | RASSF1A              | NM_007182     | 3p21.3       | a protein similar to the RAS effector proteins                              | 0                | 0 (0.4)            |

Data Supplement Table 3. A Pairwise Correlation Analysis between Methylation of All Genes in the Training Cohort

|       | CDH1                       | ER                         | RIL                        | PGRA                       | PGRB                       | CDH13                      | NOR1                       | NPM2                       | OLIG2                      |
|-------|----------------------------|----------------------------|----------------------------|----------------------------|----------------------------|----------------------------|----------------------------|----------------------------|----------------------------|
| P15   | R=0.56<br><i>P</i> <0.0001 | R=0.22<br><i>P</i> =0.03   | R=0.43<br><i>P</i> <0.0001 | R=0.42<br><i>P</i> <0.0001 | R=0.3<br><i>P</i> =0.007   | R=0.44<br><i>P</i> <0.0001 | R=0.33<br><i>P</i> =0.002  | R=0.43<br><i>P</i> =0.002  | R=0.44<br><i>P</i> <0.0001 |
| CDH1  |                            | R=0.45<br><i>P</i> <0.0001 | R=0.46<br><i>P</i> <0.0001 | R=0.66<br><i>P</i> <0.0001 | R=0.41<br><i>P</i> <0.0001 | R=0.59<br><i>P</i> <0.0001 | R=0.47<br><i>P</i> <0.0001 | R=0.46<br><i>P</i> <0.0001 | R=0.69<br><i>P</i> <0.0001 |
| ER    |                            |                            | R=0.20<br><i>P</i> =0.05   | R=0.25<br><i>P</i> =0.02   | R=0.14<br><i>P</i> =0.18   | R=0.44<br><i>P</i> <0.0001 | R=0.49<br><i>P</i> <0.0001 | R=0.33<br><i>P</i> =0.002  | R=0.38<br><i>P</i> =0.0003 |
| RIL   |                            |                            |                            | R=0.17<br><i>P</i> =0.11   | R=0.17<br><i>P</i> =0.10   | R=0.19<br><i>P</i> =0.07   | R=0.52<br><i>P</i> <0.0001 | R=0.52<br><i>P</i> <0.0001 | R=0.38<br><i>P</i> =0.0004 |
| PGRA  |                            |                            |                            |                            | R=0.32<br><i>P</i> =0.002  | R=0.40<br><i>P</i> <0.0001 | R=0.25<br><i>P</i> =0.02   | R=0.42<br><i>P</i> <0.0001 | R=0.47<br><i>P</i> <0.0001 |
| PGRB  |                            |                            |                            |                            |                            | R=0.39<br><i>P</i> <0.0001 | R=0.18<br><i>P</i> =0.09   | R=0.31<br><i>P</i> =0.003  | R=0.46<br><i>P</i> <0.0001 |
| CDH13 |                            |                            |                            |                            |                            |                            | R=0.35<br><i>P</i> =0.001  | R=0.33<br><i>P</i> =0.002  | R=0.57<br><i>P</i> <0.0001 |
| NOR1  |                            |                            |                            |                            |                            |                            |                            | R=0.48<br><i>P</i> <0.0001 | R=0.54<br><i>P</i> <0.0001 |
| NPM2  |                            |                            |                            |                            |                            |                            |                            |                            | R=0.42<br><i>P</i> <0.0001 |

\* all of the correlation coefficients were positive and statistically significant.

Data Supplement Table 4. Correlation between Average Methylation (by z-score) and Clinical Features According to Treatment

| Characteristic                                       | without decitabine/azacitidine treatment |               |                | with decitabine/azacitidine treatment |              |                |
|------------------------------------------------------|------------------------------------------|---------------|----------------|---------------------------------------|--------------|----------------|
|                                                      | N                                        | mean (SD)     | <i>P</i> value | N                                     | mean (SD)    | <i>P</i> value |
| Age, years                                           |                                          |               |                |                                       |              |                |
| < 45                                                 | 10                                       | 0.37 (0.62)   | 0.25           | 2                                     | -0.31 (0.10) | 0.24           |
| 45-65                                                | 71                                       | 0.18 (0.67)   |                | 60                                    | 0.24 (0.56)  |                |
| > 65                                                 | 81                                       | 0.06 (0.59)   |                | 93                                    | 0.14 (0.51)  |                |
| Gender                                               |                                          |               |                |                                       |              |                |
| Male                                                 | 106                                      | 0.07 (0.54)   | 0.10           | 114                                   | 0.20 (0.57)  | 0.26           |
| Female                                               | 56                                       | 0.25 (0.77)   |                | 41                                    | 0.11 (0.39)  |                |
| Hemoglobin level, Hg (g/dL)                          |                                          |               |                |                                       |              |                |
| < 10                                                 | 90                                       | 0.15 (0.66)   | 0.75           | 104                                   | 0.19 (0.54)  | 0.68           |
| ≥ 10                                                 | 70                                       | 0.12 (0.59)   |                | 49                                    | 0.15 (0.51)  |                |
| Absolute neutrophil count, ANC (x10 <sup>9</sup> /l) |                                          |               |                |                                       |              |                |
| < 1.8                                                | 84                                       | 0.14 (0.59)   | 0.92           | 104                                   | 0.22 (0.53)  | 0.41           |
| ≥ 1.8                                                | 76                                       | 0.13 (0.68)   |                | 45                                    | 0.14 (0.53)  |                |
| Platelet count (x10 <sup>9</sup> /l)                 |                                          |               |                |                                       |              |                |
| < 100                                                | 103                                      | 0.17 (0.64)   | 0.39           | 106                                   | 0.19 (0.55)  | 0.79           |
| ≥ 100                                                | 58                                       | 0.08 (0.61)   |                | 46                                    | 0.16 (0.49)  |                |
| Marrow blast percentage                              |                                          |               |                |                                       |              |                |
| < 5                                                  | 81                                       | 0.01 (0.52)   | 0.01           | 42                                    | 0.14 (0.55)  | 0.64           |
| 5-10                                                 | 32                                       | 0.08 (0.60)   |                | 50                                    | 0.20 (0.47)  |                |
| 11-20                                                | 30                                       | 0.37 (0.87)   |                | 46                                    | 0.14 (0.51)  |                |
| 21-30                                                | 18                                       | 0.41 (0.51)   |                | 15                                    | 0.33 (0.78)  |                |
| IPSS risk category                                   |                                          |               |                |                                       |              |                |
| Low                                                  | 30                                       | -0.005 (0.55) | 0.006          | 6                                     | 0.19 (0.71)  | 0.68           |
| Intermediate 1                                       | 60                                       | -0.04 (0.52)  |                | 57                                    | 0.17 (0.52)  |                |
| Intermediate 2                                       | 44                                       | 0.31 (0.79)   |                | 66                                    | 0.12 (0.43)  |                |
| High                                                 | 26                                       | 0.34 (0.53)   |                | 25                                    | 0.27 (0.70)  |                |
| FAB type                                             |                                          |               |                |                                       |              |                |
| Refractory anemia (RA)                               | 54                                       | 0.04 (0.52)   | 0.08           | 17                                    | 0.17 (0.50)  | 0.11           |
| Refractory anemia with ringed sideroblasts (RAS)     | 17                                       | -0.12 (0.56)  |                | 8                                     | -0.15 (0.31) |                |
| Refractory anemia with excess blasts (RAEB, RAEBT)   | 75                                       | 0.25 (0.70)   |                | 104                                   | 0.23 (0.56)  |                |
| Chronic myelomonocytic leukemia (CML, CMML)          | 16                                       | 0.18 (0.58)   |                | 23                                    | 0.03 (0.43)  |                |
| Karyotype                                            |                                          |               |                |                                       |              |                |
| Good                                                 | 81                                       | 0.07 (0.56)   | 0.25           | 78                                    | 0.16 (0.56)  | 0.86           |
| Intermediate                                         | 30                                       | 0.26 (0.62)   |                | 42                                    | 0.22 (0.59)  |                |
| Poor                                                 | 39                                       | 0.16 (0.52)   |                | 28                                    | 0.18 (0.39)  |                |
| MDS type                                             |                                          |               |                |                                       |              |                |
| De novo                                              | 121                                      | 0.15 (0.66)   | 0.58           | 115                                   | 0.14 (0.56)  | 0.18           |
| Secondary                                            | 41                                       | 0.09 (0.54)   |                | 40                                    | 0.26 (0.44)  |                |

Data Supplement Table 5. Correlation between Methylation of All Genes at Baseline and Clinical Responses to Decitabine Treatment

| Responses | Phase 3 trial (N=89) |    |                     |      |         | Phase 2 trail (N=75) |    |                     |      |         |
|-----------|----------------------|----|---------------------|------|---------|----------------------|----|---------------------|------|---------|
|           | N                    | %  | Methylation Z score |      | P value | N                    | %  | Methylation Z score |      | P value |
|           |                      |    | Mean                | SD   |         |                      |    | Mean                | SD   |         |
| CR/PR     | 8                    | 9  | -0.08               | 0.39 | 0.09    | 35                   | 47 | 0.16                | 0.42 | 0.29    |
| CB        | 9                    | 10 | -0.10               | 0.53 |         | 25                   | 33 | 0.17                | 0.28 |         |
| SD        | 29                   | 33 | -0.15               | 0.53 |         | 2                    | 3  | -0.25               | 0.03 |         |
| PD        | 30                   | 34 | 0.19                | 0.80 |         | 7                    | 9  | 0.33                | 0.55 |         |
| NE        | 13                   | 14 | 0.03                | 0.42 |         | 6                    | 8  | 0.21                | 0.44 |         |

CR: complete remission; PR: partial remission; CB: clinical benefit; SD: stable disease; PD: progress disease; NE: not evaluated  
 NE cases was excluded from statistitic analysis
